# Supplementary material for: Utilisation of rehabilitation services for non-migrant and migrant groups of higher working age in Germany – results of the lidA cohort study
Source: PubMed Central journal article supplement (PMC6954536; doi:10.1186/s12913-019-4845-z), 2020-01-10
Supplement: 12913_2019_4845_MOESM1_ESM.pdf [file 12913_2019_4845_MOESM1_ESM.pdf]

**Additional file 1:** English version of self-developed questionnaire items used for analysis

| Questionnaire item           | Translation of the question including response options                                                                                                                                                                                                                                                                                                                                                                                                                                                        |
|------------------------------|---------------------------------------------------------------------------------------------------------------------------------------------------------------------------------------------------------------------------------------------------------------------------------------------------------------------------------------------------------------------------------------------------------------------------------------------------------------------------------------------------------------|
| Sex                          | Sex of the respondent (not asked, registered only)<br>- male<br>- female                                                                                                                                                                                                                                                                                                                                                                                                                                      |
| Year of birth                | Please tell me when you were born? Please tell me the day, the month and the year.<br>__ day (two digits) __ month (two digits) ____ year (four digits)                                                                                                                                                                                                                                                                                                                                                       |
| Rehabilitation services      | Have you utilised a medical rehabilitation since 2008?<br>- no<br>- yes, an inpatient treatment with accommodation in a rehabilitation hospital.<br>- yes, an outpatient treatment.                                                                                                                                                                                                                                                                                                                           |
| Migrant background           | Were you born in Germany?<br>- yes<br>- no<br><br>In which country were you born? (open question)<br>- [country of birth]<br><br>What is your nationality?<br>- German<br>- Other, [nationality]<br>- dual nationality<br>- stateless<br><br>Our next questions refer to your parents. Was your father born in Germany?<br>- yes<br>- no<br>- father unknown, no step- or adoptive father etc.<br><br>Was your mother born in Germany?<br>- yes<br>- no<br>- mother unknown, no step- or adoptive mother etc. |
| Main language spoken at home | Which language do you normally speak at home?<br>- only German<br>- mostly German<br>- mostly another language<br>- only another language                                                                                                                                                                                                                                                                                                                                                                     |
